# Supplementary material
Source: PubMed Central journal article supplement (PMC1838514)

O.D.(405-690nm)

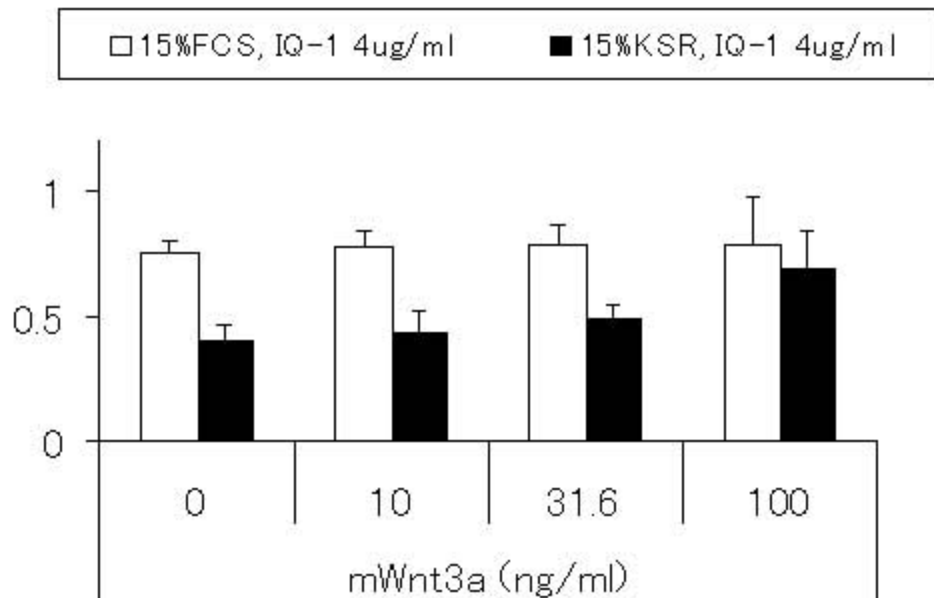

Supplement: pnas_0701331104_3.pdf [file pnas_0701331104_3.pdf]

(c)

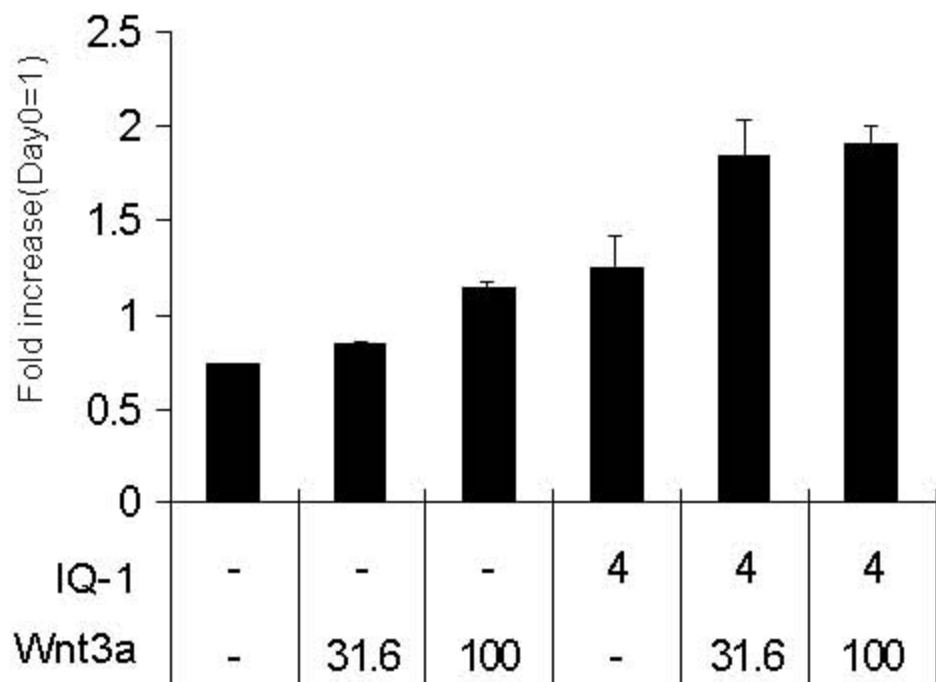

Supplement: pnas_0701331104_6.pdf [file pnas_0701331104_6.pdf]
